# Supplementary material for: Synthesis of Mesoporous Cu-Ni/Al2O4 Catalyst for Hydrogen Production via Hydrothermal Reconstruction Route
Source: MDPI journal article supplement (doi:10.3390/catal12010032), 2021-12-28
Supplement: s1 [file s1]

## Supplementary Materials

### Synthesis of Mesoporous Cu-Ni/Al<sub>2</sub>O<sub>3</sub> Catalyst for Hydrogen Production via Hydrothermal Reconstruction Route

Kai-Jhei Lin <sup>1</sup>, Yi-Kai Chih <sup>2</sup>, Wei-Hsin Chen <sup>2,3,4</sup>, Hsin-Kai Huang <sup>1</sup>, Hong-Ping Lin <sup>1,\*</sup> and Chun-Han Hsu <sup>5,\*</sup>

<sup>1</sup> Department of Chemistry, National Cheng Kung University, Tainan 701, Taiwan

<sup>2</sup> Department of Aeronautics and Astronautics, National Cheng Kung University, Tainan 701, Taiwan

<sup>3</sup> Research Center for Smart Sustainable Circular Economy, Tunghai University, Taichung 407, Taiwan

<sup>4</sup> Department of Mechanical Engineering, National Chin-Yi University of Technology, Taichung 411, Taiwan

<sup>5</sup> General Education Center, National Tainan Junior College of Nursing, Tainan 700, Taiwan

\* Correspondence: hplin@mail.ncku.edu.tw (H.-P.L.); chhsu@ntin.edu.tw (C.-H.H.);

Tel.: +886-2757575-65342 (H.-P.L.)

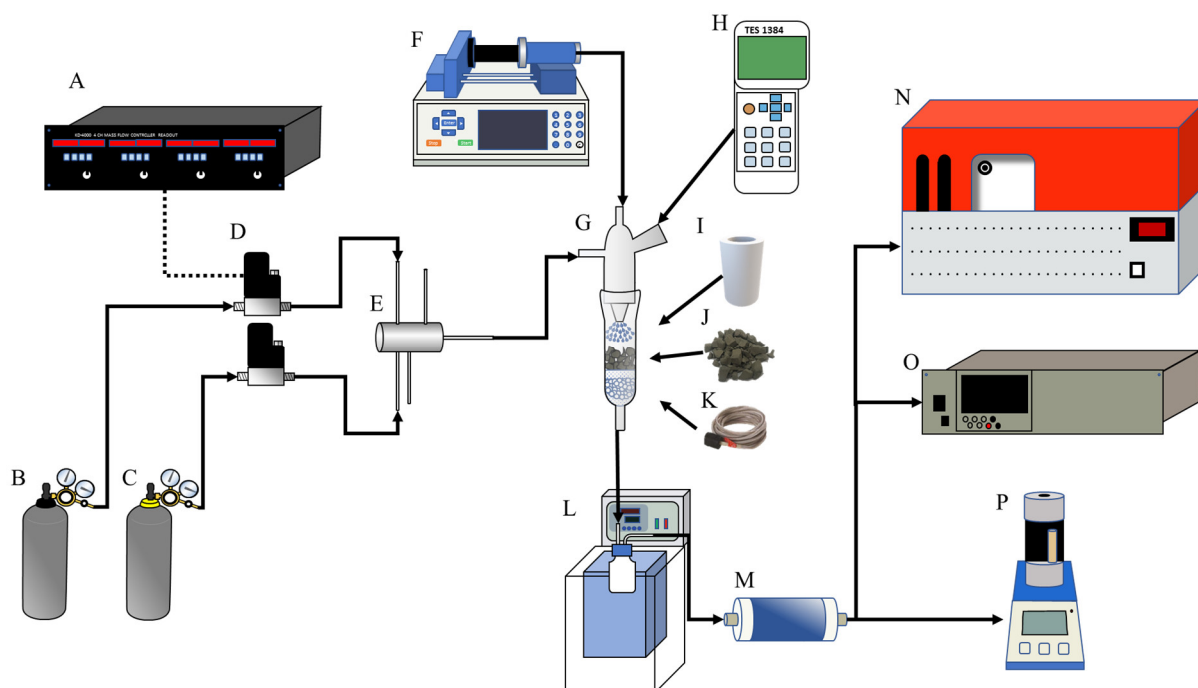

**Figure S1.** A schematic of the experimental system. (A: electric flow rate controller; B: air cylinder; C: N<sub>2</sub> cylinder; D: controller readout E: gas mixer; F: syringe pump; G: reactor; H: thermometer; I: refractory wool; J: catalyst; K: heating tape; L: condenser; M: dryer; N: gas chromatography; O: gas analyzer; P: flow rate meter). Available online: <https://doi.org/10.1016/j.ijhydene.2021.06.103>.
